# Supplementary material for: β-Catenin and NF-κB co-activation triggered by TLR3 stimulation facilitates stem cell-like phenotypes in breast cancer
Source: PubMed Central journal article supplement (PMC4291491; doi:10.1038/cdd.2014.145), 2014-09-26
Supplement: cdd2014145x1.pdf [file cdd2014145x1.pdf]

## Supplemental Information

# **$\beta$ -catenin and NF- $\kappa$ B co-activation triggered by TLR3 stimulation facilitates stem cell-like phenotypes in breast cancer**

Deyong Jia<sup>1</sup>, Weixia Yang<sup>1,2</sup>, Li Li<sup>1</sup>, Huijuan Liu<sup>1,3</sup>, Yuan Tan<sup>1</sup>, Sarah Ooi<sup>1</sup>, Lingyi Chi<sup>4</sup>, Lionel G. Fillion<sup>1</sup>, Daniel Figeys<sup>1,5,7</sup>, Lisheng Wang<sup>1,6,7</sup>

<sup>1</sup> Department of Biochemistry, Microbiology and Immunology, Faculty of Medicine, University of Ottawa, 451 Smyth Road, Ottawa, ON K1H 8M5, Canada

<sup>2</sup> Life Science College of Northwest A&F University, Yangling, Shaanxi712100, China

<sup>3</sup> Bio-X Institutes, Key Laboratory for the Genetics of Developmental and Neuropsychiatric Disorders, Ministry of Education, Shanghai Jiao Tong University, Shanghai 200240, China

<sup>4</sup> Department of Neurosurgery, Qilu Hospital of Shandong University, Jinan, Shandong 250012, China

<sup>5</sup> Department of Chemistry, University of Ottawa

<sup>6</sup> Regenerative Medicine Program, Ottawa Hospital Research Institute,

<sup>7</sup> Ottawa Institute of Systems Biology, University of Ottawa, Canada

\* Correspondence: Lisheng Wang ([lwang@uottawa.ca](mailto:lwang@uottawa.ca))

## CONTENT OF SUPPLEMENTARY INFORMATION

### I. SUPPLEMENTARY TABLE

**Table S1, related to Materials and Methods**

List of primers used in quantitative PCR for measuring gene expression relative to GAPDH.

### II. SUPPLEMENTARY FIGURES

**Figure S1, related to Figure 2**

Prolonged poly(I:C) treatment further promotes the growth of tumor cell aggregates with increased expression levels of stem cell markers.

**Figure S2, related to Figure 2**

Poly(I:C)-treated breast cancer cells exhibit a higher capacity to form mammospheres.

**Figure S3, related to Figure 2**

The increased expressions of CSCs-markers in both CD44<sup>high</sup>/CD24<sup>-/low</sup> and CD44<sup>-/low</sup>/CD24<sup>high</sup> subpopulations after poly(I:C) treatment.

**Figure S4, related to Figure 3**

Representative photographs of the nude mice after secondary transplantation.

**Figure S5, related to Figure 5**

Poly(I:C) treatment activates Wnt/ $\beta$ -catenin signaling pathway.

**Figure S6**

A graphical outline.

## I. SUPPLEMENTARY TABLE

**Table S1. List of primers used in quantitative PCR for measuring gene expression relative to GAPDH (Related to Materials and Methods)**

| Gene names | Forward                   | Reverse                   |
|------------|---------------------------|---------------------------|
| Oct4       | CTGCAGTGTGGGTTTCGGGCA     | CTTGCTGCAGAAGTGGGTGGAGGAA |
| Nanog      | CATGAGTGTGGATCCAGCTTG     | CCTGAATAAGCAGATCCATGG     |
| IL-6       | AACAACCTGAACCTTCCAAAGA    | TCAAACCTCCAAAAGACCAGTGA   |
| Axin2      | GTCACCAAACCCATGCCTGTCTCT  | TAAGCACCGTCTTGATCGCCCAAT  |
| Cyclin D1  | AATGACCCCGCACGATT         | GCACAGAGGGCAACGAAGG       |
| IKBa       | CTCCGAGACTTTCGAGGAAATAC   | GCCATTGTAGTTGGTAGCCTTCA   |
| IL-8       | ATGACTTCCAAGCTGGCCGTGGCT  | TTCAGCCCTCTTCAAAAACCTTCTC |
| Klf4       | CAAGTCCC GCCGCTCCATTACCAA | CCACAGCCGTCCCAGTCACAGTGG  |
| TLR3       | TAGCAGTCATCCAACAGAATCAT   | AATCTTCTGAGTTGATTATGGGTAA |
| MMP9       | TTGACAGCGACAAGAAGTG       | CTGAGGAATGATCTAAGCC       |
| ALDH1      | CGCAAGACAGGCTTTTCAG       | TGTATAATAGTCGCCCCCTCTC    |
| TERT       | ATGCGACAGTTCGTGGCTCA      | ATCCCCTGGCACTGGACGTA      |
| CD44       | AGACAACCACAAGGATGACTGATG  | TCCAGTTTCCTTCATAAGCAGTGG  |
| c-Myc      | TTCTCTCCGTCCTCGGATTCTCTG  | TCTTCTTGTTCCCTCCTCAGAGTCG |
| Sox2       | CATCACCCACAGCAAATGACAGC   | TTGCGTGAGTGTGGATGGGATTG   |
| GAPDH      | ACAGTCAGCCGCATCTTCTT      | GACAAGCTTCCC GTTCTCAG     |

## II. SUPPLEMENTARY FIGURES

**Figure S1**

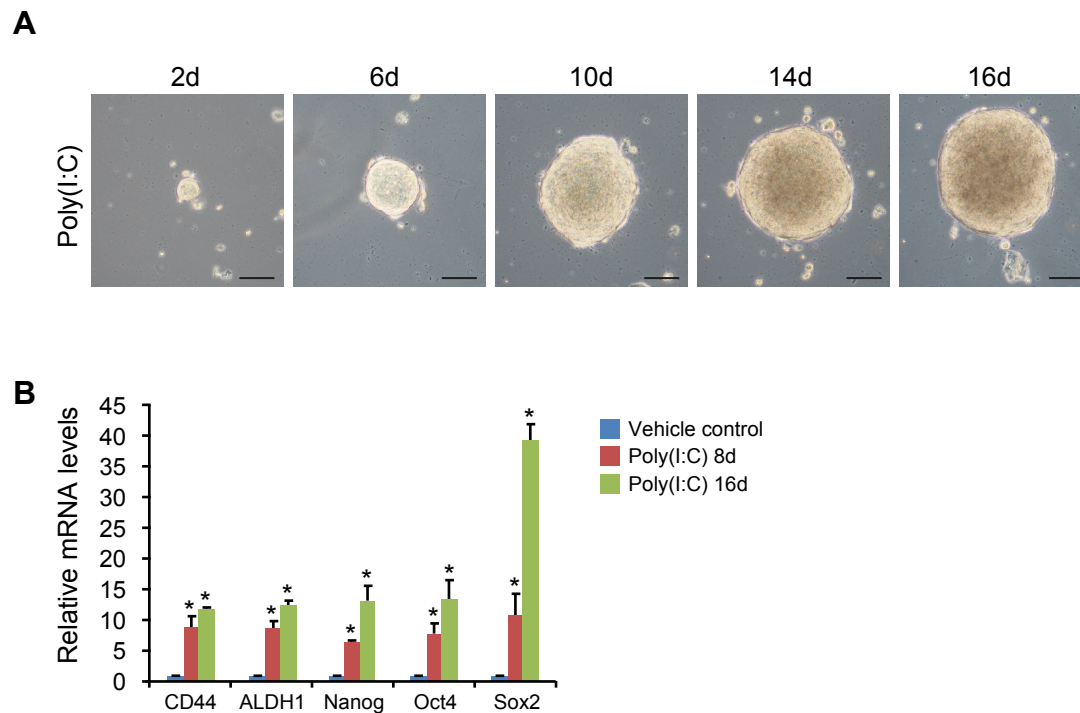

**Figure S1. Prolonged poly(I:C) treatment further promotes the growth of tumor cell aggregates with increased expression levels of stem cell markers, related to Figure 2.**

**A.** Phase-contrast images of the growing colonies after 1 µg/ml of poly(I:C) treatment for 2d, 6d, 10d, 14d, and 16d. Scale bars, 100 µm.

**B.** Quantitative real-time PCR analyses of the indicated genes in SUM190 cells after treatment with 1 µg/ml of poly(I:C) for representative days (8d and 16d). GAPDH mRNA was used to normalize variability in template loading. Data represent the average  $\pm$  SD,  $n = 3$ ; \*  $p < 0.05$

## Figure S2

**A**

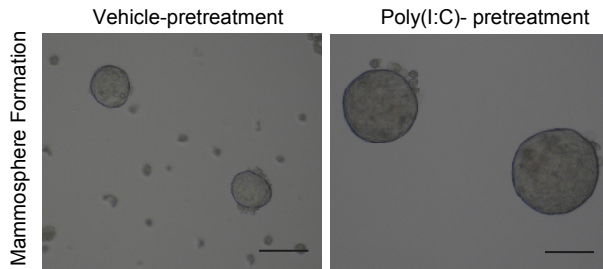

**B**

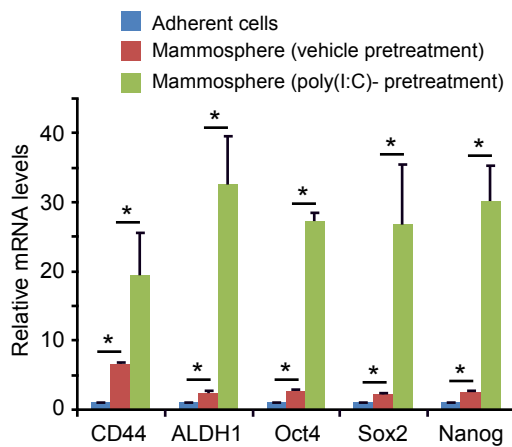

**C**

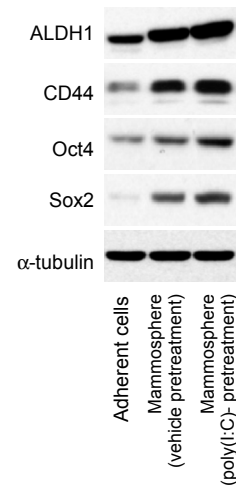

**Figure S2. Poly(I:C)-treated breast cancer cells exhibit a higher capacity to form mammospheres, related to Figure 2.**

**A.** SUM190 cells were treated with vehicle (control) or poly(I:C) for 4d and re-seeded in mammosphere culture conditions for 4d to assess their mammosphere formation capacity. Scale bars, 100  $\mu$ m.

**B.** Quantitative real-time PCR analyses of the indicated genes in adherent cells, mammospheres after vehicle-pretreatment or poly(I:C)-pretreatment. GAPDH mRNA was used to normalize variability in template loading. Data represent the average  $\pm$  SD,  $n = 3$ ; \*  $p < 0.05$ .

**C.** Western blot analysis of ALDH1, CD44, Oct4, and Sox2 for the indicated groups as shown in B.  $\alpha$ -tubulin was included as an internal loading control.

**Figure S3**

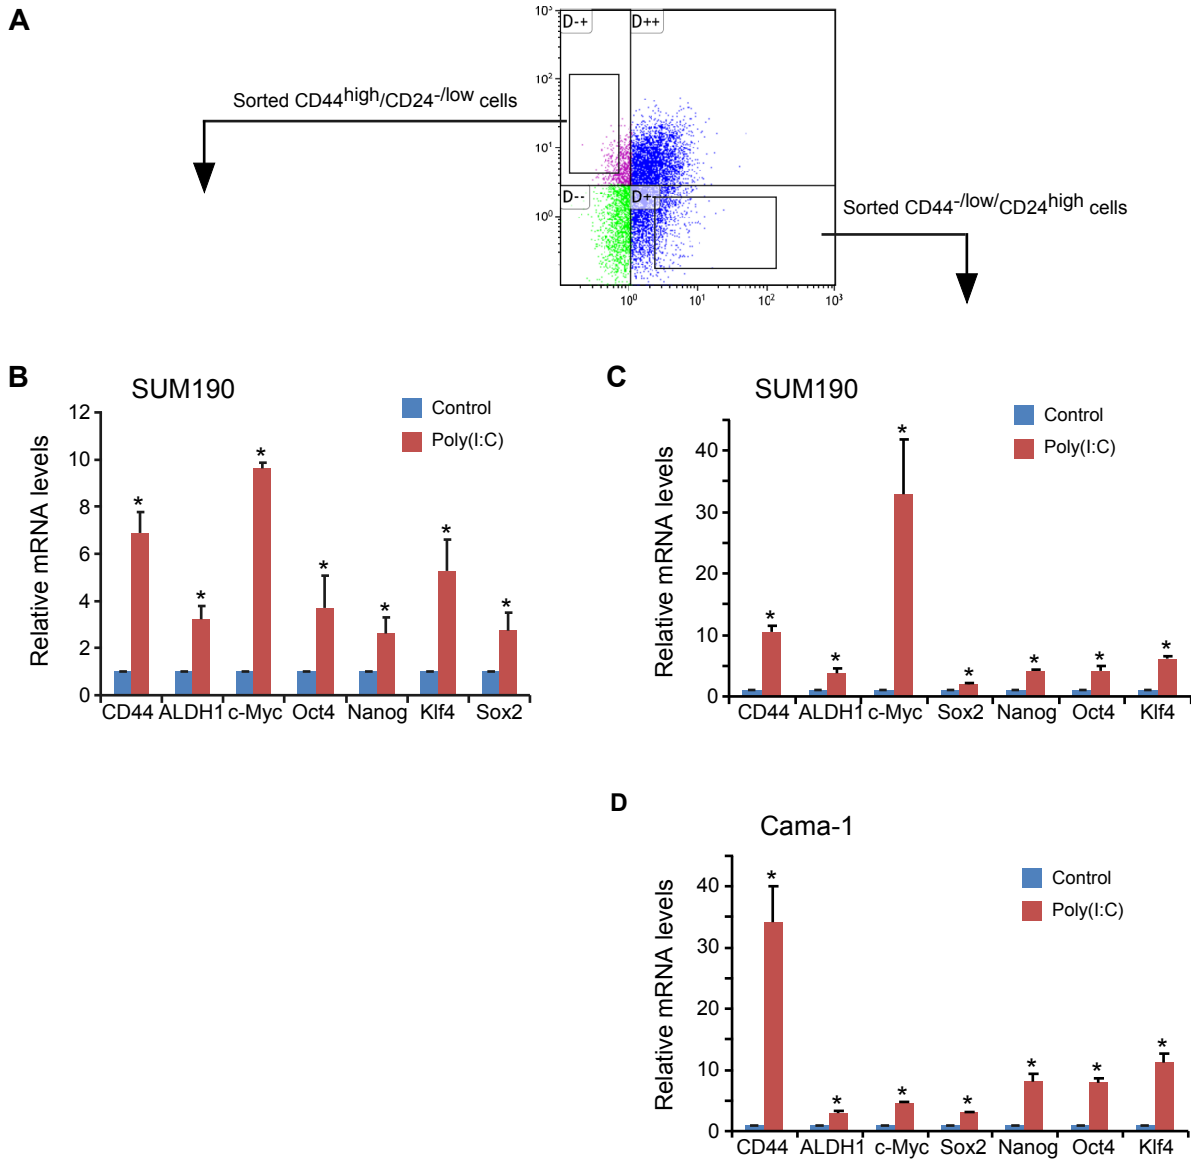

**Figure S3. The increased expressions of CSCs-markers in both CD44<sup>high</sup>/CD24<sup>-low</sup> and CD44<sup>-low</sup>/CD24<sup>high</sup> subpopulations after poly(I:C) treatment, related to Figure 2.**

CD44<sup>high</sup>/CD24<sup>-low</sup> and CD44<sup>-low</sup>/CD24<sup>high</sup> cells were fractionated by flow cytometry (A) and cultured in the medium containing 1 µg/ml of poly(I:C) for 4d. Total RNA was extracted from the cells using the RNeasy Mini kit from Qiagen followed by quantitative real-time PCR analysis. The indicated stem markers were significantly up-regulated after poly(I:C) treatment in both CD44<sup>high</sup>/CD24<sup>-low</sup> (representing CSC subset; B, SUM190 breast cancer cells) and CD44<sup>-low</sup>/CD24<sup>high</sup> cells (representing non-CSC subset; C, SUM190; D, Cama-1 breast cancer cells). These results suggest that poly(I:C) promotes CSC phenotypes in both CSC and non-CSC subpopulations. Data represent the average ± SD, n = 3; \* p < 0.05.

## Figure S4

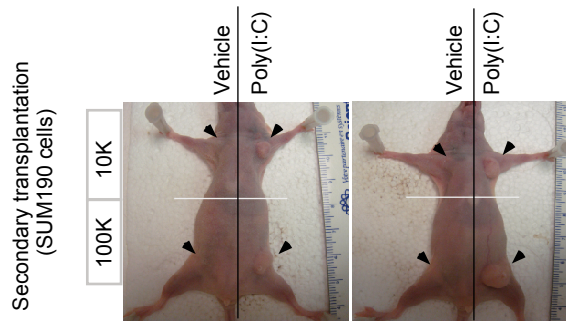

**Figure S4. Representative photographs of the nude mice after secondary transplantation, related to Figure 3.**

Each mammary fat pad of nude mice was inoculated with 100,000 or 10,000 of SUM190 cells harvested from the first transplanted mice that had been injected with vehicle or poly(I:C) for approximately 30d.

## Figure S5

**A**

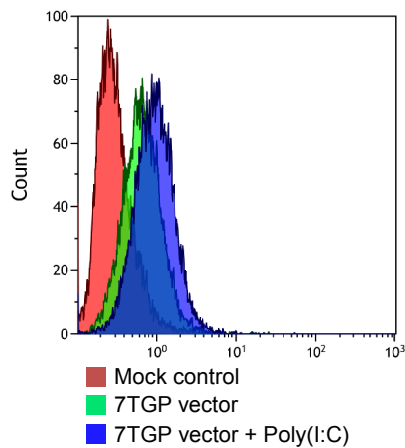

**B**

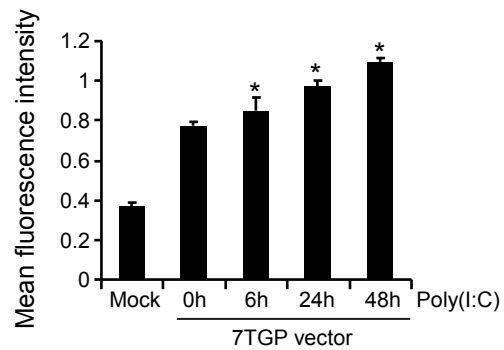

**Figure S5. Poly(I:C) treatment activates Wnt/ $\beta$ -catenin signaling pathway, related to Figure 5.**

**A.** Flow cytometry analysis for the expression of TCF-eGFP reporter activity (7TGP vector) in the lentivirus-transduced SUM190 cells in the presence or absence of poly(I:C) for 48h.

**B.** Mean fluorescence intensity of TCF-eGFP activity after poly(I:C) treatment for 6h, 24h, and 48h from 3 independent experiments. \*  $p < 0.05$ .

**Figure S6**

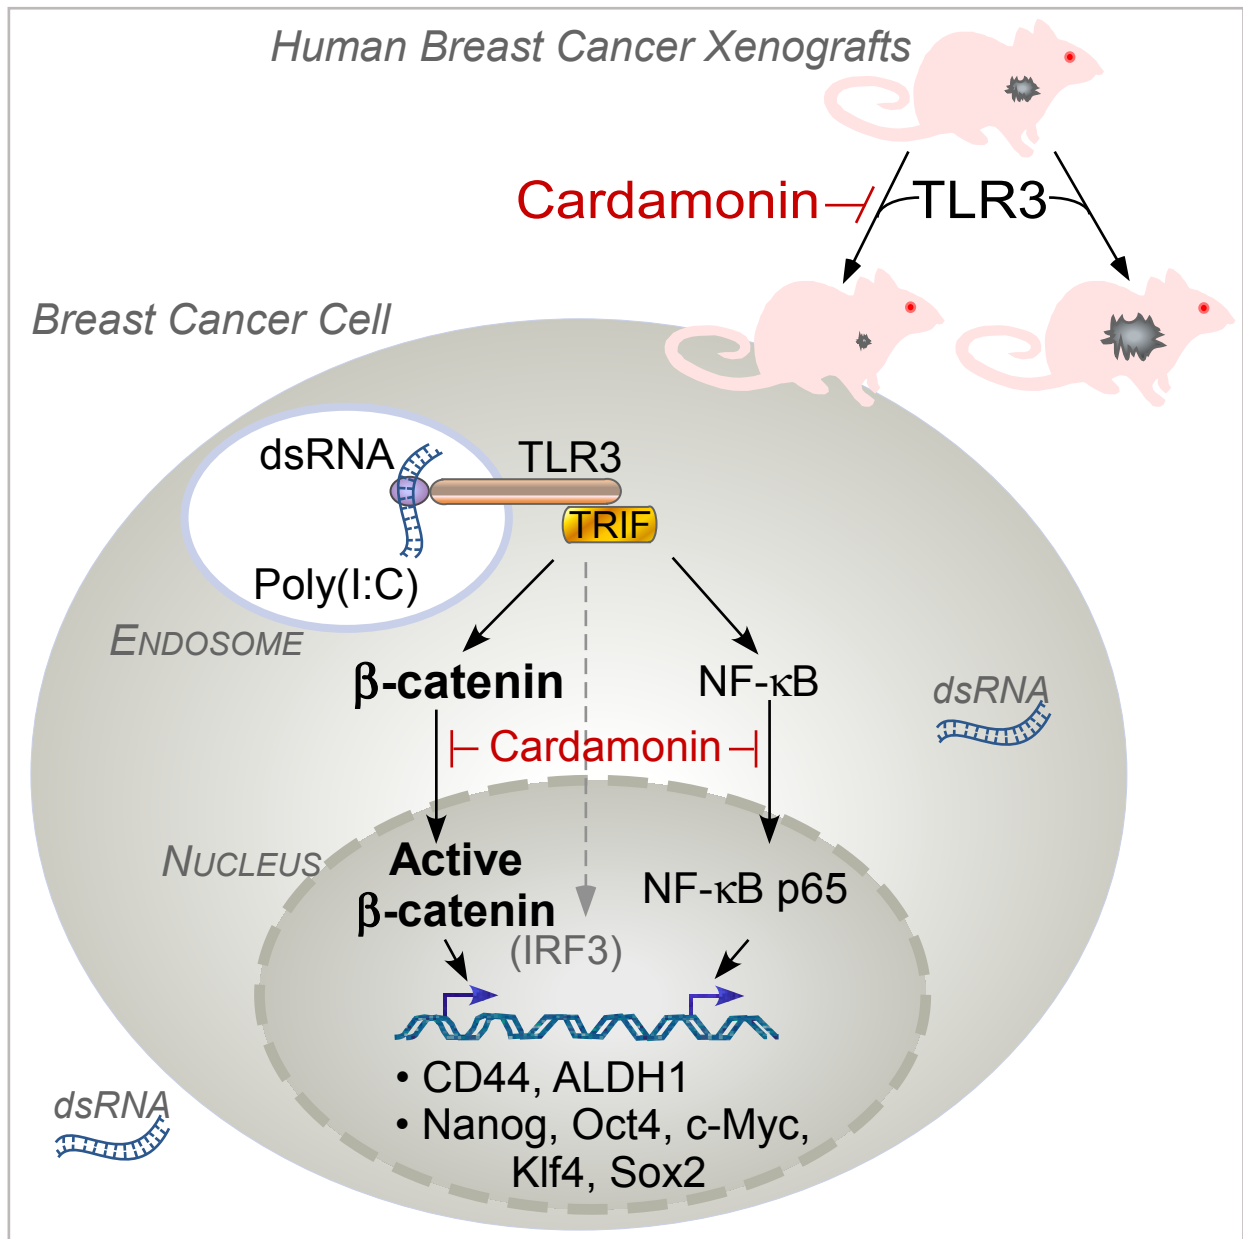

**Figure S6. A graphical outline.**

$\beta$ -catenin pathway is required for the promotion of CSC phenotypes in breast cancer cells following TLR3 activation. Inhibition of both  $\beta$ -catenin and NF- $\kappa$ B is an effective strategy to control the growth of human breast cancer induced by TLR3 activation.
